# Supplementary material for: Multiplex Avidity Assay for Evaluating Thyroid Autoantibodies
Source: Preprints.org preprint supplement (doi:10.20944/preprints202311.0628.v1), 2023-11-09
Supplement: Supplementary file 1 [file supplementary]

|         |     |        |          |          |     |     |          |          |          |
|---------|-----|--------|----------|----------|-----|-----|----------|----------|----------|
| M       | PBS | mAb T3 | PBS      | PBS      | PBS | PBS | mAb T3   | PBS      | M        |
| mAb Tg  | TPO | TPO    | Tg_R132  | Tg_R132  | TPO | TPO | Tg_R132  | Tg_R132  | mAb T4-1 |
| mAb Tg  | T4  | T4     | Tg_8TG52 | Tg_8TG52 | T4  | T4  | Tg_8TG52 | Tg_8TG52 | mAb T4-1 |
| PBS     | T3  | T3     | PDS      | PDS      | T3  | T3  |          |          | PBS      |
| mAb TPO | CA2 | CA2    | PDS      | PDS      |     |     | PDS      | PDS      | mAb T4-2 |
| mAb TPO | CA2 | CA2    | PK       | PK       | CA2 | CA2 | PK       | PK       | mAb T4-2 |
| IgG     |     |        |          | PBS      | PBS | PBS | PBS      |          | IgG 3.1  |
| M       | IgG | IgG    | IgG      | PBS      | PBS | PBS | PBS      | IgG      | M        |

**Figure S1.** Microarray layout. Abbreviations: TPO - Thyroid peroxidase, Tg - Thyroglobulin, T3-HRP - 3,5,3'-Triiodothyronine (T3) Conjugate with Horseradish Peroxidase, T4-HRP - Thyroxine (T4) conjugate with horseradish peroxidase, PDS - pendrin, PK - pyruvate kinase, CA2 - carbanhydrase 2, IgG - human immunoglobulin G, mAb - mouse monoclonal antibodies, PBS - phosphate-buffered saline (Reference empty elements with no proteins), M - marker elements
